# Supplementary material for: MiR-124 aggravates failing hearts by suppressing CD151-facilitated angiogenesis in heart
Source: PubMed Central journal article supplement (PMC5865677; doi:10.18632/oncotarget.24205), 2018-01-12
Supplement: oncotarget-09-14382-s001.pdf [file oncotarget-09-14382-s001.pdf]

# MiR-124 aggravates failing hearts by suppressing CD151-facilitated angiogenesis in heart

## SUPPLEMENTARY MATERIALS

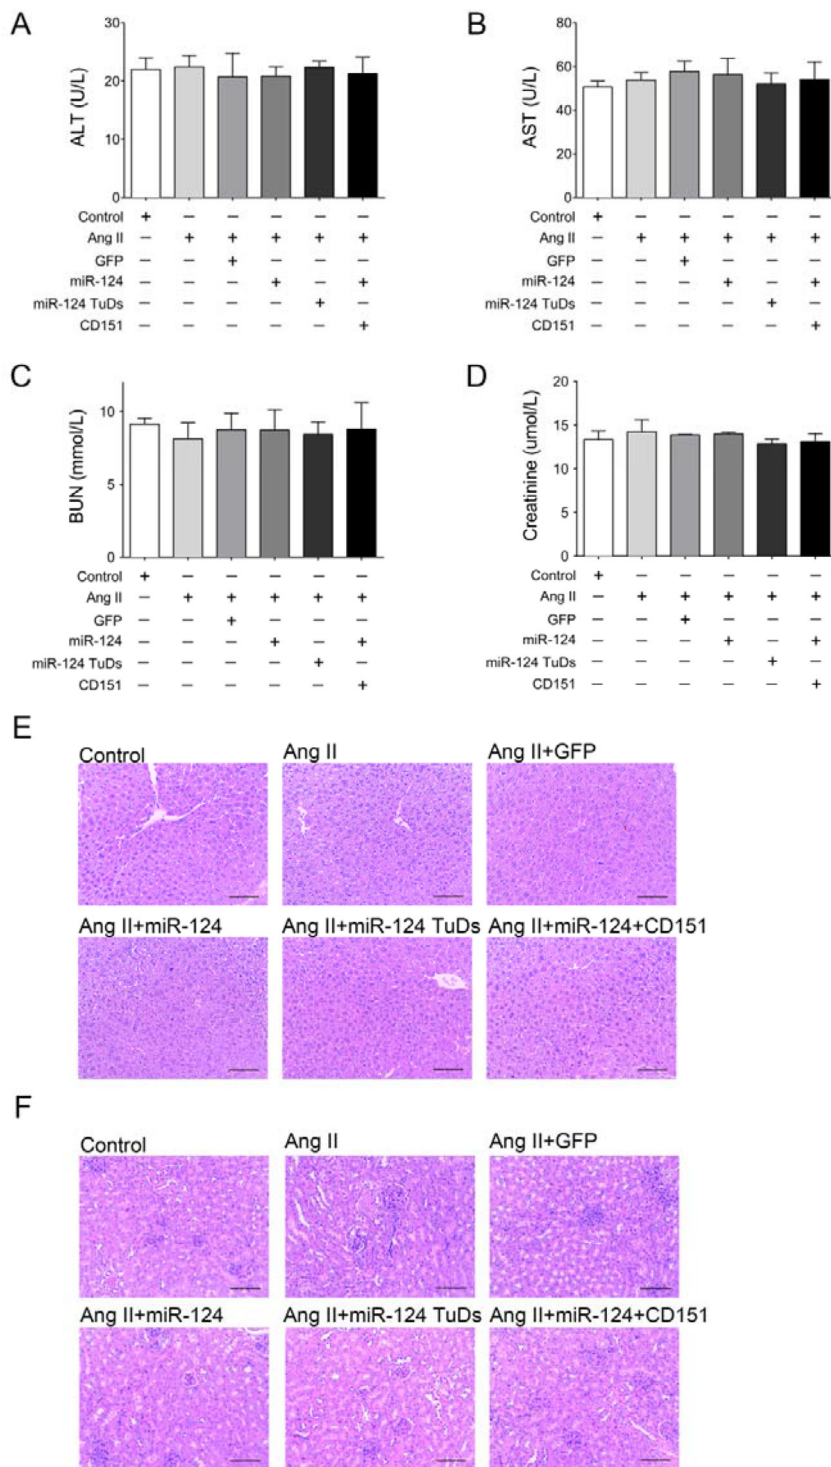

**Supplementary Figure 1: Liver and renal function tests and morphologic features.** (A) Serum ALT, AST (B), BUN (C) and creatinine (D) determined in mice with different treatments. (E) Representative images (200X) of H&E staining of livers and kidneys (F) from mice that received different treatments. Scale bar, 100 um.
